# Supplementary material for: Exploring the plant-associated bacterial communities in Medicago sativa L
Source: BMC Microbiol. 2012 May 20;12:78. doi: 10.1186/1471-2180-12-78 (PMC3412730; doi:10.1186/1471-2180-12-78)

a

**a**

Number of  
IGS-TRFs

|                 |                                                                                    |           |
|-----------------|------------------------------------------------------------------------------------|-----------|
| Pot 1<br>Nodule | 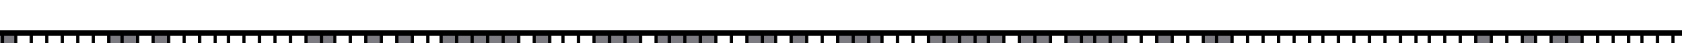 | <b>51</b> |
| Pot 1<br>Soil   | 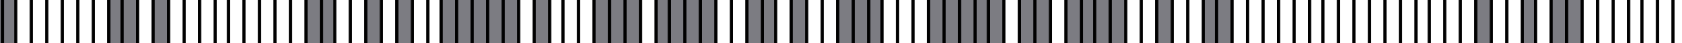 | <b>30</b> |
| Pot 2<br>Nodule | 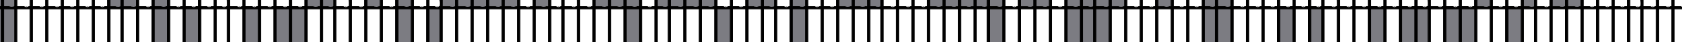 | <b>22</b> |
| Pot 2<br>Soil   | 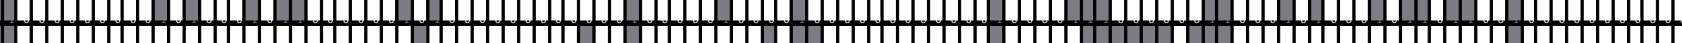 | <b>47</b> |
| Pot 3<br>Nodule | 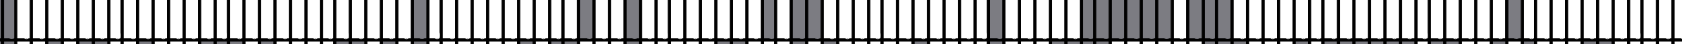 | <b>20</b> |
| Pot 3<br>Soil   | 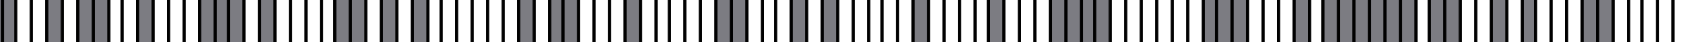 | <b>32</b> |

**b**

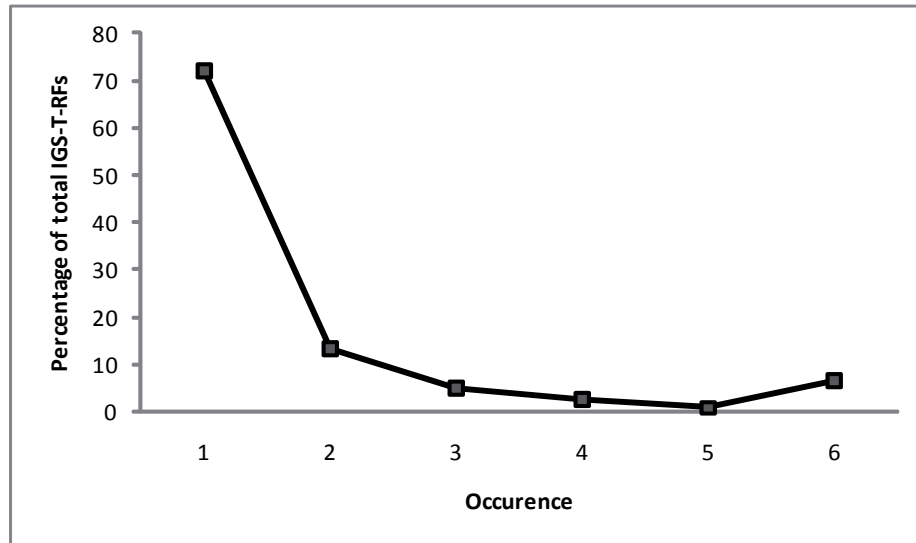

Supplement: Additional file 4 — Figure S1. S. meliloti IGS-T-RFLP profiling of nodule and soil samples. A), the schematic representation of the binary matrix of IGS-T-RF presence (black) and absence (empty cell); the IGS-T-RF number is reported on the right side of each row. B) The occurrence of “private” and “public” IGS-T-RFs. The percentage of total number of scored IGS-T-RFs is reported for T-RFs present from 1 to all 6 samples analyzed. [file 1471-2180-12-78-S4.pdf]
